# Supplementary material for: Light, temperature, and pH control of aqueous azopyridine-terminated poly(N-isopropylacrylamide) solutions
Source: Royal Society of Chemistry journal article supplement (doi:10.1039/c9py01086f), 2019-01-01
Supplement: c9py01086f1.pdf [file c9py01086f1.pdf]

## *Supporting Information*

### **Light, temperature, and pH control of aqueous Azopyridine-terminated Poly(N-isopropylacrylamides) solutions**

*Hao Ren, <sup>a</sup> Xing-Ping Qiu, <sup>b</sup> Yan Shi, <sup>c</sup> Peng Yang, <sup>a</sup> Françoise M. Winnik\*<sup>d</sup>*

<sup>a</sup> Key Laboratory of Applied Surface and Colloid Chemistry, Ministry of Education, School of Chemistry and Chemical Engineering, Shaanxi Normal University, Xi'an 710119, China

<sup>b</sup> Department of Chemistry, University of Montreal, CP 6128 Succursale Centre Ville, Montreal, QC, H3C 3J7, Canada.

<sup>c</sup> School of Materials Science and Engineering, Beijing University of Chemical Technology, Beijing 100029, P. R. China.

<sup>d</sup> Laboratory of Polymer Chemistry, Department of Chemistry, PB 55, University of Helsinki, Helsinki FI00140 Finland

E-mail: francoise.winnik@helsinki.fi

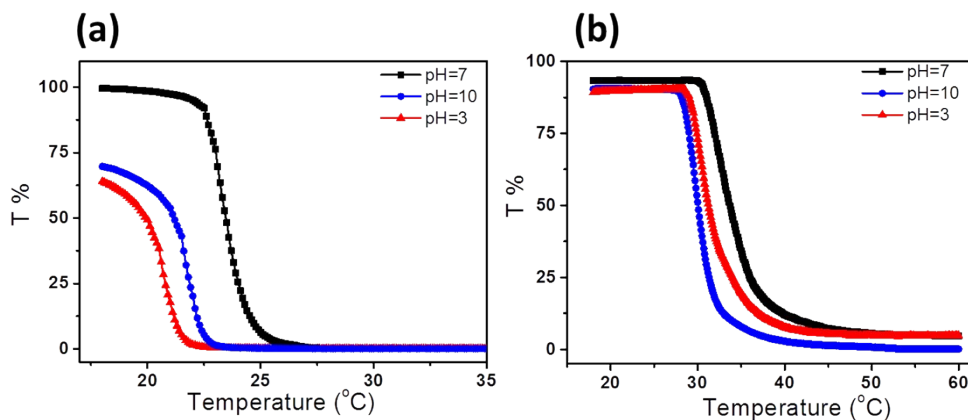

**Figure S1.** Cloud points determination from transmittance at 550 nm of (a), C12-PN-Azo 12K and (b), C12-PN-AzPyC<sub>2</sub>H<sub>5</sub><sup>+</sup> 12K (1.0 mg/mL) under different pH values.

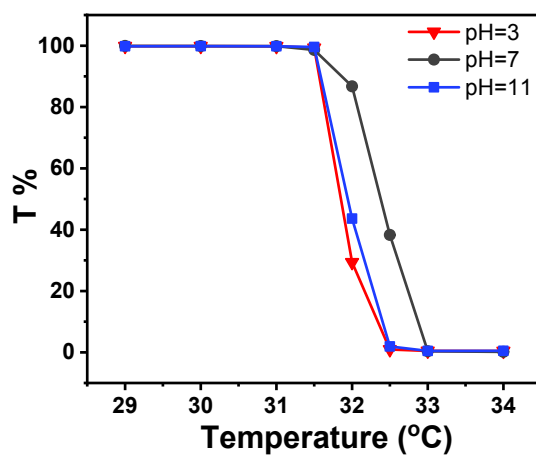

**Figure S2.** Plot of the % transmittance at 550 nm as a function of temperature for solutions of PNIPAM (1.0 mg/mL) of various pH.

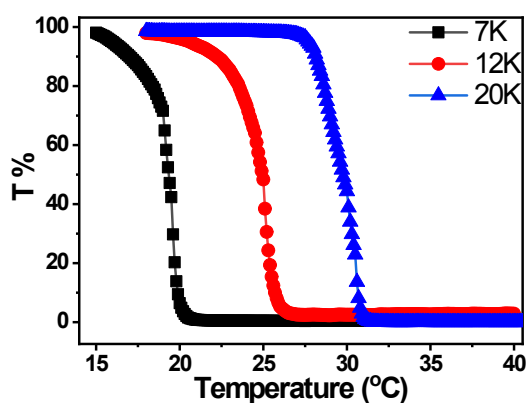

**Figure S3.** Plots of the % transmittance at 550 nm as a function of temperature for solutions of C12-PN-AzPy of various molar mass in water (pH 10).

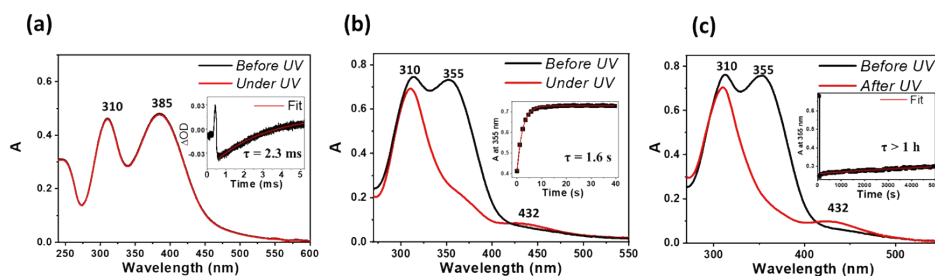

**Figure S4.** UV-Vis spectra of aqueous solutions of C12-PN-AzPy 7K (0.5 mg/mL) under (a) pH 3, (b) pH 7 and (c) pH 10 before (black line) and under constant irradiation (red line); inset: transient absorption monitored at 355 nm of the solution after a 10 s irradiation at 365 nm, 15 °C.

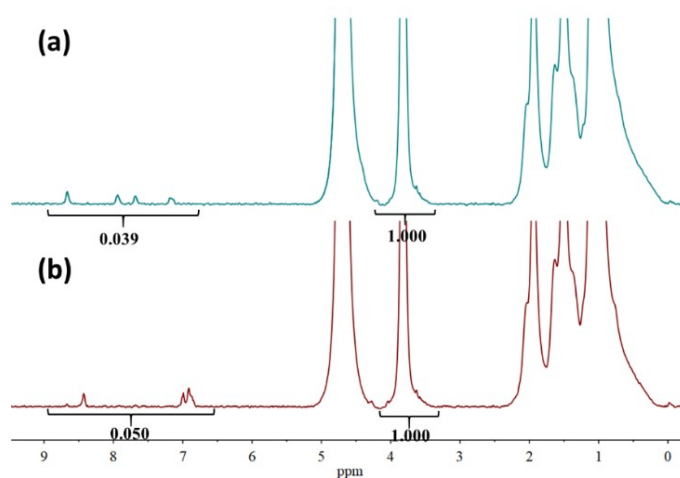

**Figure S5.**  $^1\text{H-NMR}$  spectrum of C12-PN-AzPy 12K (a) before and (b) after UV irradiation under pH = 10. (1.0 mg/mL in  $\text{D}_2\text{O}$ , 18.5 °C);

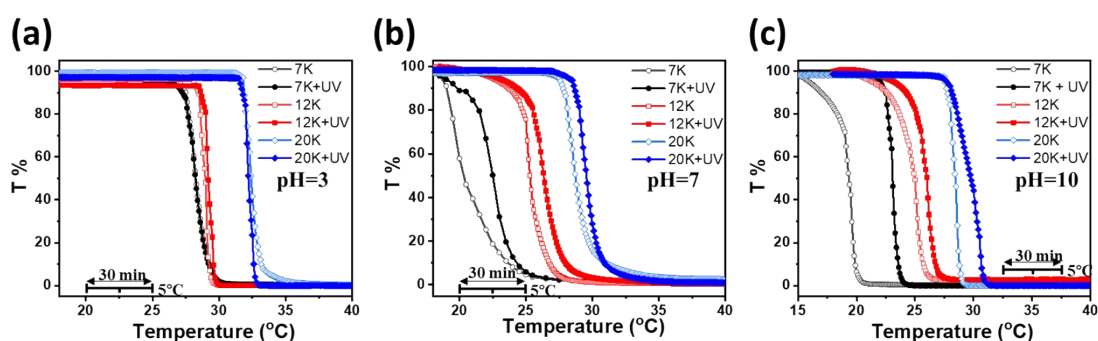

**Figure S6.** Changes of the transmittance at 550 nm as a function of temperature for aqueous solutions of C12-PN-AzPy (1.0 mg/mL) of (a) pH 3, (b) pH 7 and (c) pH 10 before irradiation (open symbols) and under continuous irradiation (full symbols) at 365 nm.

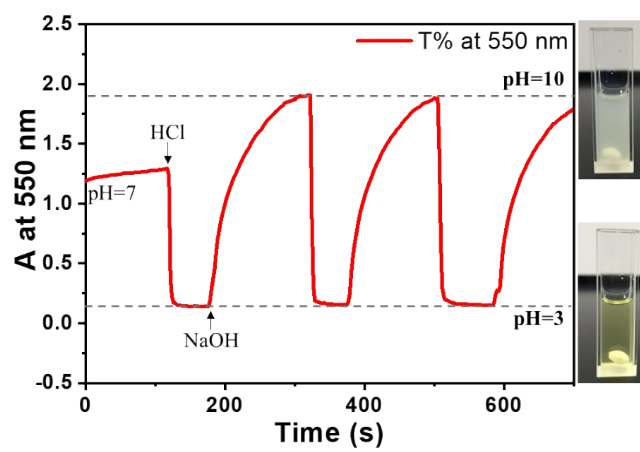

**Figure S7.** Plots of the absorbance at 550 nm as a function of pH for solutions of C12-PN-AzPy 7K at 20 °C (1.0 mg/mL)
